# Supplementary material for: A Highly Unstable and Elusive Plasmid That Encodes the Type III Secretion System Is Necessary for Full Virulence in the Marine Fish Pathogen Photobacterium damselae subsp. piscicida
Source: Int J Mol Sci. 2022 Apr 25;23(9):4729. doi: 10.3390/ijms23094729 (PMC9105992; doi:10.3390/ijms23094729)
Supplement: Supplementary file 1 [file ijms-23-04729-s001.zip › Supplementary material_Table S1.xlsx]

## Sheet: Table S1
CDS	Gene	Functional category	T3SS part and position		Putative function	Locus tag
1	parA	Partition	-	-	ParA family protein	E4T26_023615
2	parB	Partition	-	-	chromosome partitioning protein ParB	E4T26_023620
3	IS*	Mobile element	-	-	IS1 family transposase	E4T26_023625
4	IS*	Mobile element	-	-	IS6 family transposase	E4T26_023630
5	IS*	Mobile element	-	-	IS6 family transposase	E4T26_023635
6	IS	Mobile element	-	-	IS1-like element ISPda1 family transposase	E4T26_023640
7	vscL	T3SS	Base	Cytoplasmic	HrpE/YscL family type III secretion apparatus protein	E4T26_023645
8	vscK	T3SS	Base	Cytoplasmic	type III secretion system sorting platform protein	E4T26_023650
9	vscJ	T3SS	Base	IM ring int	type III secretion inner membrane ring lipoprotein	E4T26_023655
10	vscI	T3SS	Base	inner rod	type III secretion system inner rod subunit	E4T26_023660
11	vscH	T3SS	Needle	Polimeryzation control	type III export protein	E4T26_023665
12	vscG	T3SS	Needle	Chaperone	YscG family type III secretion system chaperone	E4T26_023670
13	vscF	T3SS	Needle	Body	type III secretion system needle filament subunit	E4T26_023675
14	vscE	T3SS	Needle	Chaperone	EscE/YscE/SsaE family type III secretion system needle protein co-chaperone	E4T26_023680
15	vscD	T3SS	Base	IM ring ext	type III secretion system inner membrane ring subunit	E4T26_023685
16	vscC	T3SS	Base	OM ring	type III secretion system outer membrane ring subunit	E4T26_023690
17	vscB	T3SS	Regulators	Secretion	YscB family type III secretion system chaperone	E4T26_023695
18	vscA	T3SS	Regulators	T3SS transcription	T3SS regulon anti-activator ExsD family protein	E4T26_023700
19	IS	Mobile element	-	-	IS91 family transposase	E4T26_023705
20	hp	-	-	-	hypothetical protein	E4T26_023710
21	vopD	T3SS	Translocon	Pore	type III secretion system translocon subunit	E4T26_023715
22	vopB	T3SS	Translocon	Pore	type III secretion system translocon subunit	E4T26_023720
23	vcrH	T3SS	Translocon	Chaperone	SycD/LcrH family type III secretion system chaperone	E4T26_023725
24	vcrV	T3SS	Needle	Tip	Type III secretion cytoplasmic inhibitor	E4T26_023730
25	vcrG	T3SS	Needle	Chaperone	LcrG family type III secretion system chaperone	E4T26_023735
26	vcrR	T3SS	Needle	Chaperone	LcrR family type III secretion system chaperone	E4T26_023740
27	vcrD	T3SS	Base	C-ring, socket/Cup	type III secretion system export apparatus subunit	E4T26_023745
28	vscY	T3SS	Base	C-ring, secretion specificity	type III secretion system chaperone	E4T26_023750
29	vscX	T3SS	Base	C-ring, secretion specificity	type III secretion system protein	E4T26_023755
30	sycN	T3SS	Regulators	Secretion	type III secretion chaperone	E4T26_023760
31	tyeA	T3SS	Regulators	Secretion	TyeA family type III secretion system gatekeeper subunit	E4T26_023765
32	yopN	T3SS	Regulators	Secretion	type III secretion system gatekeeper subunit	E4T26_023770
33	vscN	T3SS	Base	ATPasa	SctN family type III secretion system ATPase	E4T26_023775
34	vscO	T3SS	Regulators	substrate recycling?	YscO family type III secretion system apparatus protein	E4T26_023780
35	vscP	T3SS	Needle	length control	type III secretion system needle length determinant	E4T26_023785
36	vscQ	T3SS	Base	Cytoplasmic	YscQ/HrcQ family type III secretion apparatus protein	E4T26_023790
37	vscR	T3SS	Base	C-ring, socket/Cup	SctR family type III secretion system export apparatus subunit	E4T26_023795
38	vscS	T3SS	Base	C-ring, socket/Cup	type III secretion system export apparatus subunit	E4T26_023800
39	vscT	T3SS	Base	C-ring, socket/Cup	type III secretion system export apparatus subunit	E4T26_023805
40	vscU	T3SS	Base	C-ring, socket/Cup	type III secretion system export apparatus subunit	E4T26_023810
41	IS*	Mobile element	-	-	IS6 family transposase	E4T26_023815
42	yopH	T3SS	Effector	Phosphatase	dual specificity protein phosphatase family protein	E4T26_023820
43	hp	-	-	-	hypothetical protein	E4T26_023825
44	IS*	Mobile element	-	-	IS91 family transposase	E4T26_023830
45	hp	-	-	-	hypothetical protein	E4T26_023835
46	hp	-	-	-	hypothetical protein	E4T26_023840
47	tir	T3SS	Effector	Chaperone	type III secretion system chaperone	E4T26_023845
48	IS	Mobile element	-	-	IS6 family transposase	E4T26_023850
49	excA	T3SS	Regulators	T3SS transcription	helix-turn-helix transcriptional regulator	E4T26_023855
50	vscW	T3SS	Base	Chaperone	YscW family type III secretion system pilotin	E4T26_023860
51	vscW	T3SS	Base	Chaperone	YscW family type III secretion system pilotin	E4T26_023865
52	excA	T3SS	Regulators	T3SS transcription	helix-turn-helix transcriptional regulator	E4T26_023870
53	IS	Mobile element	-	-	IS6 family transposase	E4T26_023875
54	tir	T3SS	Effector	Chaperone	type III secretion system chaperone	E4T26_023880
55	hp	-	-	-	hypothetical protein	E4T26_023885
56	hp	-	-	-	hypothetical protein	E4T26_023890
57	IS*	Mobile element	-	-	IS91 family transposase	E4T26_023895
58	hp	-	-	-	hypothetical protein	E4T26_023900
59	yopH	T3SS	Effector	Phosphatase	dual specificity protein phosphatase family protein	E4T26_023905
60	IS*	Mobile element	-	-	IS6 family transposase	E4T26_023910
61	vscU	T3SS	Base	C-ring, socket/Cup	type III secretion system export apparatus subunit	E4T26_023915
62	vscT	T3SS	Base	C-ring, socket/Cup	type III secretion system export apparatus subunit	E4T26_023920
63	vscS	T3SS	Base	C-ring, socket/Cup	type III secretion system export apparatus subunit	E4T26_023925
64	vscR	T3SS	Base	C-ring, socket/Cup	SctR family type III secretion system export apparatus subunit	E4T26_023930
65	vscQ	T3SS	Base	Cytoplasmic	YscQ/HrcQ family type III secretion apparatus protein	E4T26_023935
66	vscP	T3SS	Needle	length control	type III secretion system needle length determinant	E4T26_023940
67	vscO	T3SS	Regulators	substrate recycling?	YscO family type III secretion system apparatus protein	E4T26_023945
68	vscN	T3SS	Base	ATPasa	SctN family type III secretion system ATPase	E4T26_023950
69	yopN	T3SS	Regulators	Secretion	type III secretion system gatekeeper subunit	E4T26_023955
70	tyeA	T3SS	Regulators	Secretion	TyeA family type III secretion system gatekeeper subunit	E4T26_023960
71	sycN	T3SS	Regulators	Secretion	type III secretion chaperone	E4T26_023965
72	vscX	T3SS	Base	C-ring, secretion specificity	type III secretion system protein	E4T26_023970
73	vscY	T3SS	Base	C-ring, secretion specificity	type III secretion system chaperone	E4T26_023975
74	vcrD	T3SS	Base	C-ring, socket/Cup	type III secretion system export apparatus subunit	E4T26_023980
75	vcrR	T3SS	Needle	Chaperone	LcrR family type III secretion system chaperone	E4T26_023985
76	vcrG	T3SS	Needle	Chaperone	LcrG family type III secretion system chaperone	E4T26_023990
77	vcrV	T3SS	Needle	Tip	Type III secretion cytoplasmic inhibitor	E4T26_023995
78	vcrH	T3SS	Translocon	Chaperone	SycD/LcrH family type III secretion system chaperone	E4T26_024000
79	vopB	T3SS	Translocon	Pore	type III secretion system translocon subunit	E4T26_024005
80	vopD	T3SS	Translocon	Pore	type III secretion system translocon subunit	E4T26_024010
81	hp	-	-	-	hypothetical protein	E4T26_024015
82	IS	Mobile element	-	-	IS91 family transposase	E4T26_024020
83	ATP-binding	ATP-binding protein	-	-	ATP-binding protein	E4T26_024025
84	IS	Mobile element	-	-	IS91 family transposase	E4T26_024030
85	hp	-	-	-	hypothetical protein	E4T26_024035
86	hp	-	-	-	hypothetical protein	E4T26_024040
87	IS*	Mobile element	-	-	IS5/IS1182 family transposase	E4T26_024045
88	recombinase	Recombinase family protein	-	-	recombinase family protein	E4T26_024050
89	ATP-binding	ATP-binding protein	-	-	ATP-binding protein	E4T26_024055
90	IS	Mobile element	-	-	IS91 family transposase	E4T26_024060
91	hp	-	-	-	hypothetical protein	E4T26_024065
92	hp	-	-	-	hypothetical protein	E4T26_024070
93	IS*	Mobile element	-	-	IS5/IS1182 family transposase	E4T26_024075
94	recombinase	Recombinase family protein	-	-	recombinase family protein	E4T26_024080
95	ATP-binding	ATP-binding protein	-	-	ATP-binding protein	E4T26_024085
96	IS	Mobile element	-	-	IS91 family transposase	E4T26_024090
97	hp	-	-	-	hypothetical protein	E4T26_024095
98	hp	-	-	-	hypothetical protein	E4T26_024100
99	IS*	Mobile element	-	-	IS5/IS1182 family transposase	E4T26_024105
100	recombinase	Recombinase family protein	-	-	recombinase family protein	E4T26_024110
101	ATP-binding	ATP-binding protein	-	-	ATP-binding protein	E4T26_024115
102	IS	Mobile element	-	-	IS91 family transposase	E4T26_024120
103	hp	-	-	-	hypothetical protein	E4T26_024125
104	hp	-	-	-	hypothetical protein	E4T26_024130
105	IS*	Mobile element	-	-	IS5/IS1182 family transposase	E4T26_024135
106	recombinase	Recombinase family protein	-	-	recombinase family protein	E4T26_024140
107	IS	Mobile element	-	-	Tn3 family transposase	E4T26_024145
108	IS	Mobile element	-	-	Tn3 family transposase	E4T26_024150
109	IS	Mobile element	-	-	IS1-like element ISPda1 family transposase	E4T26_024155
110	traI*	Conjugation region	-	-	AAA family ATPase	E4T26_024160
111	traD*	Conjugation region	-	-	type IV conjugative transfer system coupling protein	E4T26_024165
112	IS	Mobile element	-	-	IS1-like element ISPda1 family transposase	E4T26_024170
113	hp	-	-	-	hypothetical protein	E4T26_024175
114	hp	-	-	-	NERD domain-containing protein	E4T26_024180
115	hp	-	-	-	DUF3465 domain-containing protein	E4T26_024185
116	traW	Conjugation region	-	-	type-F conjugative transfer system protein	E4T26_024190
117	hp	-	-	-	hypothetical protein	E4T26_024195
118	trbI	Conjugation region	-	-	TrbI F-type domain-containing protein	E4T26_024200
119	traC*	Conjugation region	-	-	type IV secretion system protein	E4T26_024205
120	IS	Mobile element	-	-	transposase	E4T26_024210
121	IS	Mobile element	-	-	IS3 family transposase	E4T26_024215
122	traV	Conjugation region	-	-	type IV conjugative transfer system lipoprotein	E4T26_024220
123	traB	Conjugation region	-	-	conjugal transfer protein	E4T26_024225
124	traK	Conjugation region	-	-	type-F conjugative transfer system secretin	E4T26_024230
125	traE	Conjugation region	-	-	type IV conjugative transfer system protein	E4T26_024235
126	traL	Conjugation region	-	-	type IV conjugative transfer system protein	E4T26_024240
127	traA	Conjugation region	-	-	type IV conjugative transfer system pilin	E4T26_024245
128	hp	-	-	-	hypothetical protein	E4T26_024250
129	hp	-	-	-	hypothetical protein	E4T26_024255
130	IS	Mobile element	-	-	IS91 family transposase	E4T26_024260
131	hp	-	-	-	hypothetical protein	E4T26_024265
132	hp*	-	-	-	hypothetical protein	E4T26_024270
133	IS	Mobile element	-	-	IS91 family transposase	E4T26_024275
134	hp	-	-	-	hypothetical protein	E4T26_024280
135	IS*	Mobile element	-	-	IS91 family transposase	E4T26_024285
136	hp	-	-	-	hypothetical protein	E4T26_024290
137	hp	-	-	-	hypothetical protein	E4T26_024295
138	chaperone	T3SS	-	Chaperone	type III secretion system chaperone	E4T26_024300
139	IS	Mobile element	-	-	IS91-like element ISPda2 family transposase	E4T26_024305
140	hp	-	-	-	hypothetical protein	E4T26_024310
141	IS	Mobile element	-	-	IS91 family transposase	E4T26_024315
142	hp		-	-	hypothetical protein	E4T26_024320
143	IS*	Mobile element	-	-	IS91 family transposase	E4T26_024325
144	hp	-	-	-	hypothetical protein	E4T26_024330
145	IS*	Mobile element	-	-	IS91 family transposase	E4T26_024335
146	hp	-	-	-	hypothetical protein	E4T26_024340
* pseudogenes
